# Supplementary material
Source: MDPI journal article supplement (https://www.mdpi.com/2673-401X/2/3/16)

# Synthesis of Illisimonin A Skeleton by Intramolecular Diels–Alder Reaction of *Ortho*-Benzoquinones and Biomimetic Skeletal Rearrangement of *Allo*-Cedranes

Takahiro Suzuki <sup>1,\*</sup>, Riko Nagahama <sup>2</sup>, Muhammad Aiman Fariz <sup>1</sup>, Yuki Yukutake <sup>2</sup>, Kazutada Ikeuchi <sup>1</sup> and Keiji Tanino <sup>1</sup>

<sup>1</sup> Department of Chemistry, Hokkaido University, Sapporo 060-0810, Hokkaido, Japan; aimanf@b@gmail.com (M.A.F.); ikeuchi@sci.hokudai.ac.jp (K.I.); ktanino@sci.hokudai.ac.jp (K.T.)

<sup>2</sup> Graduate School of Chemical Sciences and Engineering, Hokkaido University, Sapporo 060-0810, Hokkaido, Japan; riko-nagahama@ds-pharma.co.jp (R.N.); yuki-yukutake@eis.hokudai.ac.jp (Y.Y.)

\* Correspondence: takahiro-suzuki@sci.hokudai.ac.jp

## Supplementary Materials

### Table of Contents

### General Information for Experimental Details

### Experimental Procedure and Compound Characterisation Data

### X-ray crystallographic analysis of 20 and 22

### NMR Spectra of 15, 16, 18, 19, 20, 21, 25, 26, and 27

### General Information for Experimental Details

All reactions sensitive to oxygen or moisture were performed under an atmosphere of dry argon in flame-dried glassware unless otherwise noted. DIPEA was distilled from CaH<sub>2</sub> and stored over KOH. Chemical reagents and anhydrous solvents were commercial grades and were used without any purification.

- **Chromatography:** Flash chromatography was performed with Silica Gel 60N (spherical, neutral), purchased from KANTO Chemical Industries Ltd, unless otherwise noted. Analytical thin layer chromatography (TLC) was performed using commercial silica gel plates (Merck, Silica Gel 60 F<sub>254</sub>).
- **FT-IR:** Infrared spectra were recorded on a JASCO FT-IR 4100 spectrometer with an ATR unit. Absorbance frequencies are recorded in reciprocal centimetres (cm<sup>-1</sup>).
- **High-resolution mass spectra (HRMS):** HRMS were obtained from a Thermo Scientific Exactive for electrospray ionization (ESI). HRMS data are reported as m/e (relative intensity), with accurate mass reported for the molecular ion [M+Na]<sup>+</sup> or [M+H]<sup>+</sup>.
- **NMR:** <sup>1</sup>H and <sup>13</sup>C NMR spectra were recorded on a JEOL ECA-500 spectrometer operating at either 500 MHz (<sup>1</sup>H NMR) or 125 MHz (<sup>13</sup>C NMR) in CDCl<sub>3</sub> as a solvent. Chemical shifts for NMR were reported in ppm relative to the chemical shift of the residual solvent (<sup>1</sup>H NMR 7.26 ppm for CDCl<sub>3</sub>; <sup>13</sup>C NMR 77.0 ppm for CDCl<sub>3</sub>). Multiplicities are indicated as; br (broad), s (singlet), d (doublet), t (triplet), q (quartet), or m (multiplet). Coupling constants (*J*) are reported in Hertz (Hz). Diastereomeric ratio was determined by <sup>1</sup>H NMR analysis.

## Experimental Procedure and Compound Characterisation Data

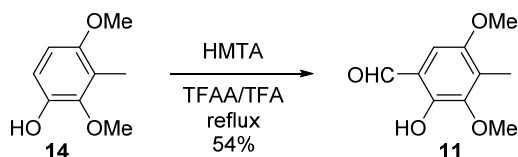

To a solution of **14** (23.7 g, 141 mmol) in TFA (45.45 mL) and TFAA (45.45 mL) was added hexamethylenetetramine (HMTA, 39.51 g, 281.8 mmol) at 0 °C. Then the mixture was heated to reflux and stirred for 24 h. Then the mixture was poured into ice and saturated aqueous NaHCO<sub>3</sub> solution and extracted with Et<sub>2</sub>O (×3). The combined organic layers were washed with brine, dried over MgSO<sub>4</sub>, filtered, and concentrated under reduced pressure. The residue was purified by recrystallization (*i*-PrOH / water) before silica gel column chromatography (n-hexane / AcOEt = 1 / 1, short column) to afford aldehyde **11** (14.9 g, 75.9 mmol, 54%). The analytical data are identical to those reported in the previous paper (Kitahara, Y.; Nakahara, S.; Numata, R.; Kubo, A., *Chem. Pharm. Bull.* **1985**, 33, 2122–2128).

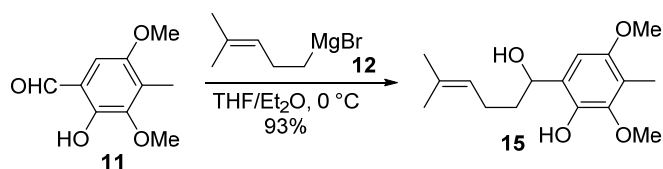

To a solution of **11** (1.19 g, 6.05 mmol) in THF (10.1 mL) was added freshly prepared Grignard reagent **12** (0.6 M solution in Et<sub>2</sub>O, 41.0 mL) dropwise at 0 °C and stirred for 1.5 h. Then the reaction mixture was quenched with saturated aqueous NH<sub>4</sub>Cl solution and acidified with 1 M HCl. The mixture was extracted with Et<sub>2</sub>O (×3). The combined organic layers were washed with saturated aqueous NaHCO<sub>3</sub> solution and brine, dried over MgSO<sub>4</sub>, filtered, and concentrated under reduced pressure. The residue was purified by silica gel column chromatography (n-hexane / AcOEt = 2 / 1) to afford diol **15** (1.59 g, 5.65 mmol, 93%).

R<sub>f</sub> 0.21 (n-hexane/EtOAc = 4/1); White amorphous; <sup>1</sup>H NMR (500 MHz, CDCl<sub>3</sub>) δ 6.46 (1H, s), 6.23 (1H, brs), 5.16 (1H, t, *J* = 7.5 Hz), 4.84 (1H, dd, *J* = 7.4, 5.7 Hz), 3.78 (3H, s), 3.76 (3H, s), 2.66 (1H, brs), 2.19–2.04 (5H, m), 1.92–1.78 (2H, m), 1.70 (3H, s), 1.61 (3H, s); <sup>13</sup>C NMR (125 MHz, CDCl<sub>3</sub>) δ 151.2, 146.2, 140.7, 132.3, 126.7, 123.9, 118.9, 104.5, 72.3, 60.7, 56.1, 37.2, 25.7, 24.6, 17.7, 9.1; IR (ATR): ν 3413, 2929, 2856, 1462, 1416, 1377, 1353, 1300, 1220, 1186, 1123, 1084, 1063, 1019, 848, 772 cm<sup>−1</sup>; HRMS (FD): Calcd for C<sub>16</sub>H<sub>24</sub>O<sub>4</sub> [M]<sup>+</sup>: 280.1675; found: 280.1665.

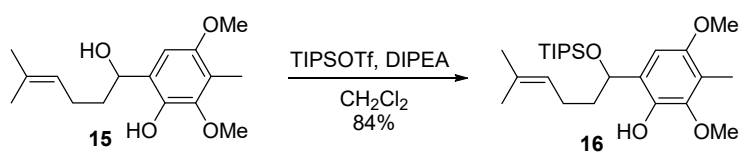

To a solution of **15** (0.836 g, 2.98 mmol) in CH<sub>2</sub>Cl<sub>2</sub> (50.0 mL) was added DIPEA (2.22 mL, 5.36 mmol) at 0 °C and stirred for 20 min. Then TIPSOTf (0.719 mL, 4.17 mmol) was added to the mixture, and the mixture was stirred at room temperature for 2 h. Then the reaction mixture was quenched with saturated aqueous NH<sub>4</sub>Cl solution and extracted with Et<sub>2</sub>O (×3). The combined organic layers were washed with brine, dried over MgSO<sub>4</sub>, filtered, and concentrated under reduced pressure. The residue was purified by silica gel

column chromatography (n-hexane / AcOEt = 10 / 1) to afford silyl ether **16** (1.10 g, 2.52 mmol, 84%).

$R_f$  0.52 (n-hexane/EtOAc = 4/1); colorless oil;  $^1\text{H}$  NMR (500 MHz,  $\text{CDCl}_3$ )  $\delta$  7.23 (brs), 6.29 (1H, s), 5.07 (1H, t,  $J$  = 6.9 Hz), 4.87 (1H, dd,  $J$  = 6.9, 5.2 Hz), 3.78 (3H, s), 3.74 (3H, s), 2.13 (3H, s), 1.92–1.86 (4H, m), 1.66 (3H, s), 1.54 (3H, s), 1.06–1.00 (21H, m);  $^{13}\text{C}$  NMR (125 MHz,  $\text{CDCl}_3$ )  $\delta$  150.6, 146.7, 141.9, 131.8, 126.0, 123.9, 119.1, 104.9, 75.2, 60.2, 56.1, 38.8, 25.6, 23.7, 17.83, 17.81, 17.7, 12.3, 12.1, 8.9; IR (ATR):  $\nu$  3384, 2941, 2893, 2866, 1462, 1415, 1378, 1355, 1298, 1248, 1220, 1188, 1125, 1078, 1013, 997, 881, 853, 829, 772, 677, 659  $\text{cm}^{-1}$ ; HRMS (FD): Calcd for  $\text{C}_{25}\text{H}_{44}\text{O}_4\text{Si}$   $[M]^+$ : 436.3009; found: 436.2988.

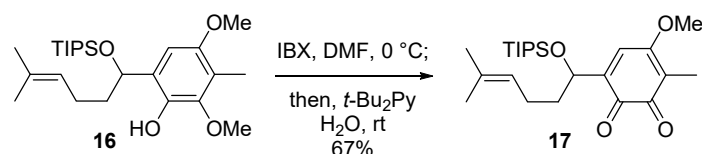

To a solution of **16** (470 mg, 1.08 mmol) in DMF (27.0 mL) was added IBX (525 mg, 1.88 mmol) at 0 °C, and the mixture was stirred for 15 h. After warming to the room temperature,  $t\text{-Bu}_2\text{Py}$  (0.725 mL, 3.23 mmol) and water (1.35 mL) was added to the mixture. The resulting mixture was stirred for 2 h. Then the reaction mixture was quenched with saturated aqueous  $\text{NaHCO}_3$  solution and extracted with  $\text{Et}_2\text{O}$  ( $\times 3$ ). The combined organic layers were washed with brine, dried over  $\text{MgSO}_4$ , filtered, and concentrated under reduced pressure. The residue was purified by silica gel column chromatography (n-hexane / AcOEt = 5 / 1) to afford ortho-benzoquinone **17** (305 mg, 0.726 mmol, 67%). Since **17** is not stable enough to measure various spectra and physical properties, **17** was used directly for the next reaction.

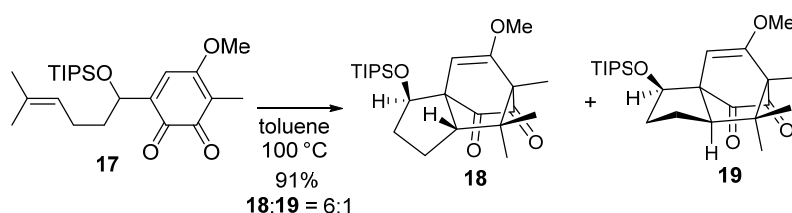

A solution of **17** (211 mg, 0.502 mmol) in toluene (33.5 mL) was stirred at 100 °C for 2.5 h. Then the mixture was cooled to room temperature and filtered through a pad of silica gel which was eluted with AcOEt. After concentration under reduced pressure, the residue was purified by silica gel column chromatography (n-hexane / AcOEt = 5 / 1) to afford cycloadducts **18** and **19** (191 mg, 0.455 mmol, 91%) as an inseparable mixture (6:1).

$R_f$  0.51 (n-hexane/EtOAc = 5/1); Yellow oil;  $^1\text{H}$  NMR (500 MHz,  $\text{CDCl}_3$ )  $\delta$  5.44 (1H of **18**, s), 5.40 (1H of **19**, s), 4.93–4.88 (1H, m), 3.64 (3H of **19**, s), 3.61 (3H of **18**, s), 2.39 (1H of **18**, ddt,  $J$  = 14.0, 7.4, 6.3 Hz), 2.14–2.06 (1H, m), 1.80–1.62 (3H, m), 1.21 (3H of **18**, s), 1.18 (3H of **19**, s), 1.10–1.00 (25H, m), 0.78 (3H of **18**, s);  $^{13}\text{C}$  NMR (125 MHz,  $\text{CDCl}_3$ )  $\delta$  194.7, 192.4, 189.8, 186.9, 158.4, 157.6, 97.2, 91.8, 69.1, 68.6, 61.7, 61.6, 61.5, 61.4, 56.7, 55.6, 55.5, 53.6, 39.9, 36.4, 35.3, 35.1, 28.2, 26.7, 24.5, 24.4, 21.4, 21.2, 18.1, 18.0, 12.2, 7.02, 6.98; IR (ATR):  $\nu$  2942, 2892, 2866, 1732, 1606, 1462, 1369, 1311, 1265, 1242, 1219, 1164, 1111, 1065, 997, 965, 902, 882, 771, 682  $\text{cm}^{-1}$ ; HRMS (FD): Calcd for  $\text{C}_{24}\text{H}_{40}\text{O}_4\text{Si}$   $[M]^+$ : 420.2696; found: 420.2691.

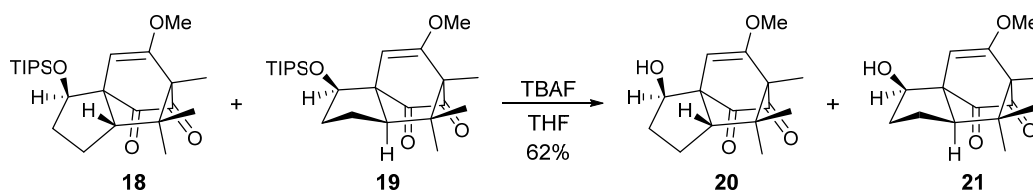

To a solution of **18** and **19** (0.896 g, 2.08 mmol, dr=6: 1) in THF (20 mL) was added a solution of TBAF in THF (1 M, 4.16 mL, 4.16 mmol) at room temperature. The resulting mixture was stirred for 3 h at room temperature. Then saturated aqueous  $\text{NaHCO}_3$  was added and the mixture was extracted with  $\text{Et}_2\text{O}$  ( $\times 3$ ). The combined organic layer was dried over  $\text{MgSO}_4$ , filtered through cotton plug, and concentrated under reduced pressure. The residue was purified by silica gel column chromatography ( $n$ -hexane /  $\text{AcOEt}$  = 5 / 1) to afford a mixture of alcohol **20** and **21** (0.340 g, 1.29 mmol, 62%) as an inseparable mixture (6:1).

$R_f$  0.36 ( $n$ -hexane/ $\text{EtOAc}$  = 1/1); Yellow solid; m.p. 130–133 °C;  $^1\text{H}$  NMR (500 MHz,  $\text{CDCl}_3$ )  $\delta$  5.36 (1H of **20**, s), 5.27 (1H of **21**, s), 4.77 (1H of **20**, dd,  $J$  = 6.9, 2.9 Hz), 4.74 (1H of **21**, dd,  $J$  = 9.7, 6.3 Hz), 3.66 (3H of **21**, s), 3.64 (3H of **20**, s), 2.42 (1H of **20**, dddd,  $J$  = 16.0, 9.2, 6.9, 1.7 Hz), 2.24–2.15 (1H of **21**, m), 2.12 (1H of **20**, dd,  $J$  = 13.7, 6.9 Hz), 1.89–1.61 (2H, m), 1.20 (3H of **20**, s), 1.17 (3H of **21**, s), 1.08–1.00 (4H, m), 0.90 (3H of **21**, s), 0.89 (3H of **21**, s), 0.79 (3H of **20**, s);  $^{13}\text{C}$  NMR (125 MHz,  $\text{CDCl}_3$ )  $\delta$  194.5, 192.3, 189.5, 188.1, 159.1, 158.0, 95.9, 90.7, 68.1, 61.4, 61.4, 61.2, 60.6, 60.7, 55.5, 55.1, 51.9, 40.0, 35.3, 34.4, 31.6, 27.9, 26.5, 23.9, 23.1, 21.2, 21.1, 13.9, 6.8, 6.7; IR (ATR):  $\nu$  3452, 2966, 2874, 1723, 1601, 1461, 1448, 1397, 1370, 1313, 1265, 1242, 1205, 1142, 1109, 1045, 1006, 994, 963, 871, 843, 820, 754  $\text{cm}^{-1}$ ;  $\text{C}_{15}\text{H}_{20}\text{O}_4$   $[\text{M}]^+$ : 264.1362; found: 264.1354.

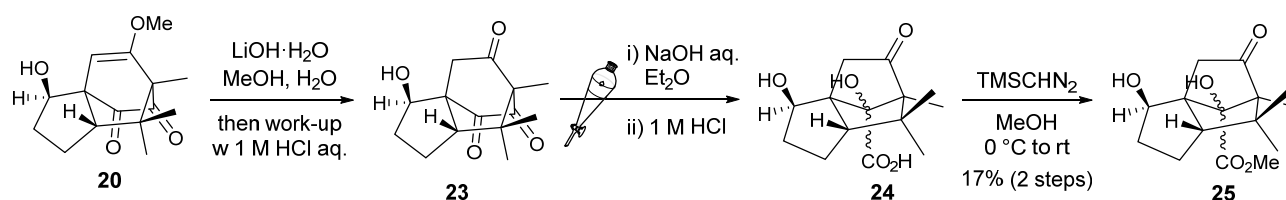

To a solution of **20** (38.9 mg, 0.147 mmol, including **19**) in  $\text{MeOH}/\text{H}_2\text{O}$ =1/1 (2.00 mL) was added  $\text{LiOH}\cdot\text{H}_2\text{O}$  (11.1 mg, 0.265 mmol) at room temperature. The resulting mixture was stirred for 48 h at room temperature. Then the mixture was heated to 50 °C and stirred for 1 h. Then aqueous 1 M  $\text{HCl}$  solution was added and the mixture was extracted with  $\text{Et}_2\text{O}$ . The combined organic layer was added aqueous 0.1 M  $\text{NaOH}$  solution until the mixture turned to basic and extracted with  $\text{Et}_2\text{O}$ . Then the organic layer was added aqueous 1 M  $\text{HCl}$  solution until the mixture turned to acidic and extracted with  $\text{Et}_2\text{O}$ . The organic layer was dried over anhydrous  $\text{MgSO}_4$ , filtered, and concentrated under reduced pressure to afford of crude **24** (30.6 mg). Another batch of the same reaction of **20** (37.2 mg, 0.141 mmol) gave crude **24** (29.0 mg). To a solution of combined **24** in  $\text{MeOH}$  (2.48 mL) was added 2M  $\text{TMSCHN}_2$  in  $\text{Et}_2\text{O}$  (0.622 mL, 0.782 mmol) dropwise at 0 °C. The resulting mixture was stirred for 8 h at 0 °C to room temperature. Then 10% aqueous  $\text{AcOH}$  was added and the mixture was extracted with  $\text{Et}_2\text{O}$ . The combined organic layer was dried over anhydrous  $\text{MgSO}_4$ , filtered through cotton plug, and concentrated under reduced pressure. The residue was purified by silica gel column chromatography ( $\text{hexane} / \text{AcOEt}$  = 1 / 4) to afford of **25** (14.0 mg, 49.6  $\mu\text{mol}$ , 17%).

$R_f$  0.014 ( $n$ -hexane/ $\text{EtOAc}$  = 2/1); Colorless oil;  $^1\text{H}$  NMR (500 MHz,  $\text{CDCl}_3$ )  $\delta$  4.32 (1H, dd,  $J$  = 7.8, 4.6 Hz), 3.78 (3H, s), 3.43 (1H, s), 2.58 (1H, d,  $J$  = 18.3 Hz), 2.53–2.45 (1H, m), 2.18–2.13 (2H, m), 2.03–1.94 (1H, m), 1.78–1.69 (2H, m), 1.14 (3H, s), 0.91 (3H, s), 0.87 (3H, s);  $^{13}\text{C}$  NMR (125 MHz,  $\text{CDCl}_3$ )  $\delta$  213.1, 173.9, 89.7, 70.8, 68.0, 62.7, 61.8, 53.3, 44.6, 39.5 (2C), 29.0, 25.3, 22.0, 6.1;

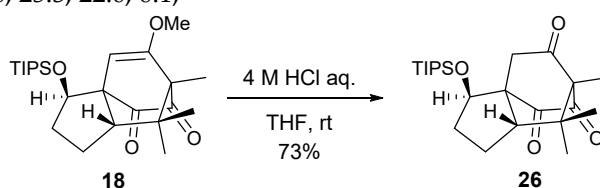



**X-ray crystallographic data for compounds 20 and 22**

(Thermal ellipsoids are drawn at the 50% probability level)

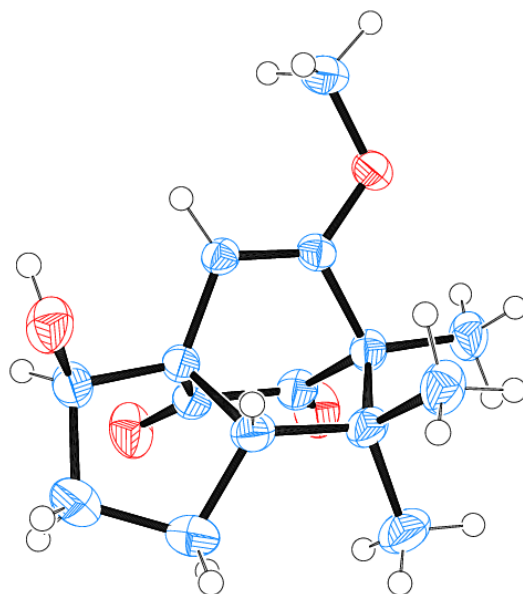

Crystal data of **20**: CCDC 2095712,  $C_{15}H_{20}O_4$ , size  $0.454 \times 0.237 \times 0.175 \text{ mm}^3$ , monoclinic,  $P2_1/c$ ,  $a = 7.61980(10) \text{ \AA}$ ,  $b = 12.1533(2) \text{ \AA}$ ,  $c = 14.5819(2) \text{ \AA}$ ,  $\alpha = \gamma = 90^\circ$ ,  $\beta = 94.1070(10)^\circ$ ,  $Z = 4$ ,  $\mu = 0.765 \text{ mm}^{-1}$ , Independent reflections 2461,  $R(\text{int}) = 0.0342$ , Goodness-of-fit on  $F^2 = 1.048$ , Final R indices  $[I > 2\sigma(I)]$   $R_1 = 0.0419$ ,  $wR_2 = 0.1157$ .

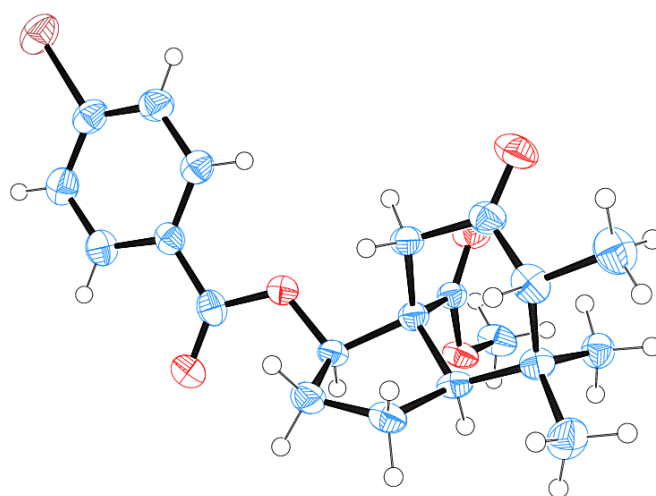

Crystal data of **22**: CCDC 2095714,  $2(C_{21}H_{25}BrO_5)$ , size  $0.389 \times 0.137 \times 0.132 \text{ mm}^3$ , monoclinic,  $P2_1/c$ ,  $a = 26.4532(3) \text{ \AA}$ ,  $b = 7.22630(10) \text{ \AA}$ ,  $c = 21.7993(3) \text{ \AA}$ ,  $\alpha = \gamma = 90^\circ$ ,  $\beta = 108.305(2)^\circ$ ,  $Z = 4$ ,  $\mu = 3.079 \text{ mm}^{-1}$ , Independent reflections 7243,  $R(\text{int}) = 0.0538$ , Goodness-of-fit on  $F^2 = 1.104$  Final R indices  $[I > 2\sigma(I)]$   $R_1 = 0.0798$ ,  $wR_2 = 0.2203$ .

## NMR Spectra of 15, 16, 18, 19, 20, 21, 25, 26, and 27

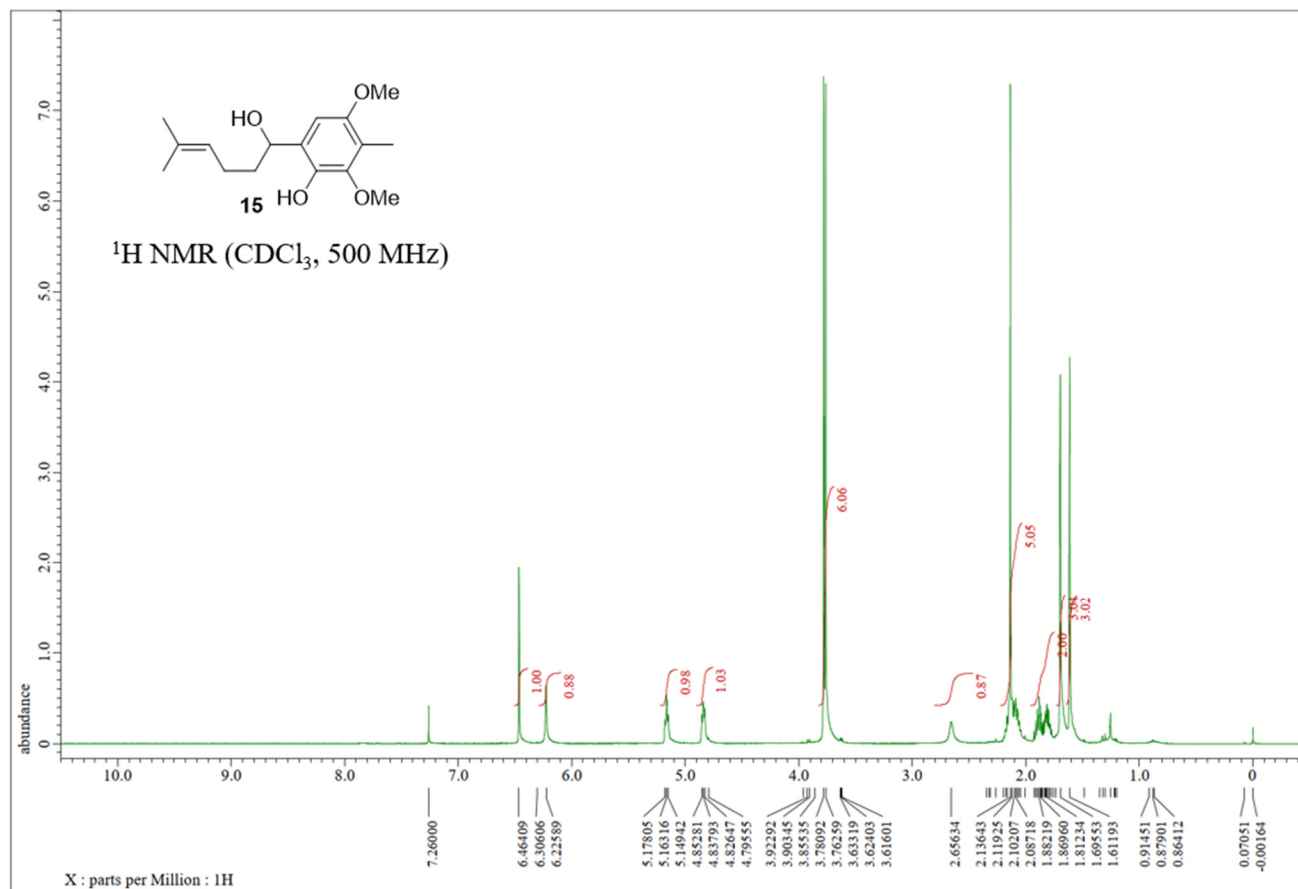

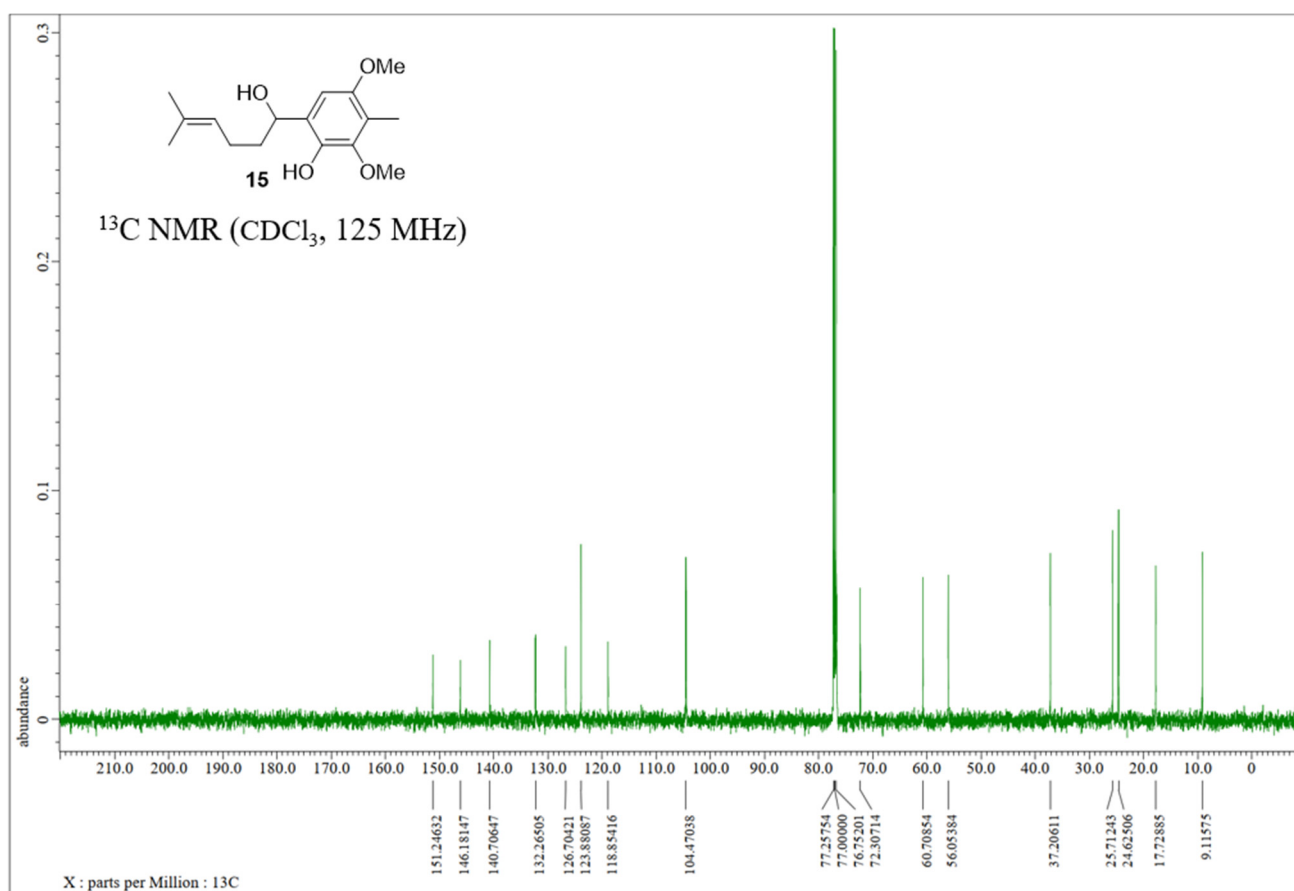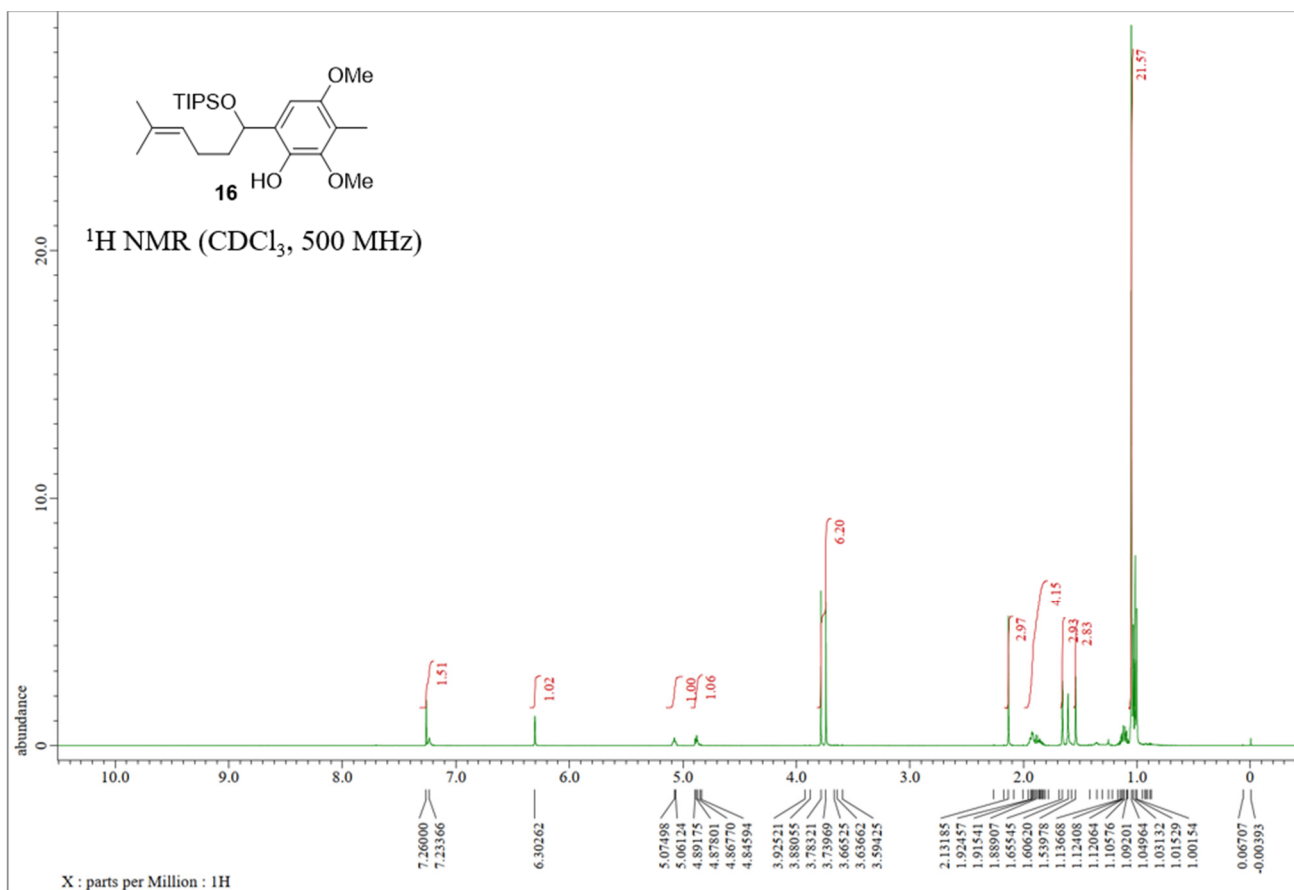

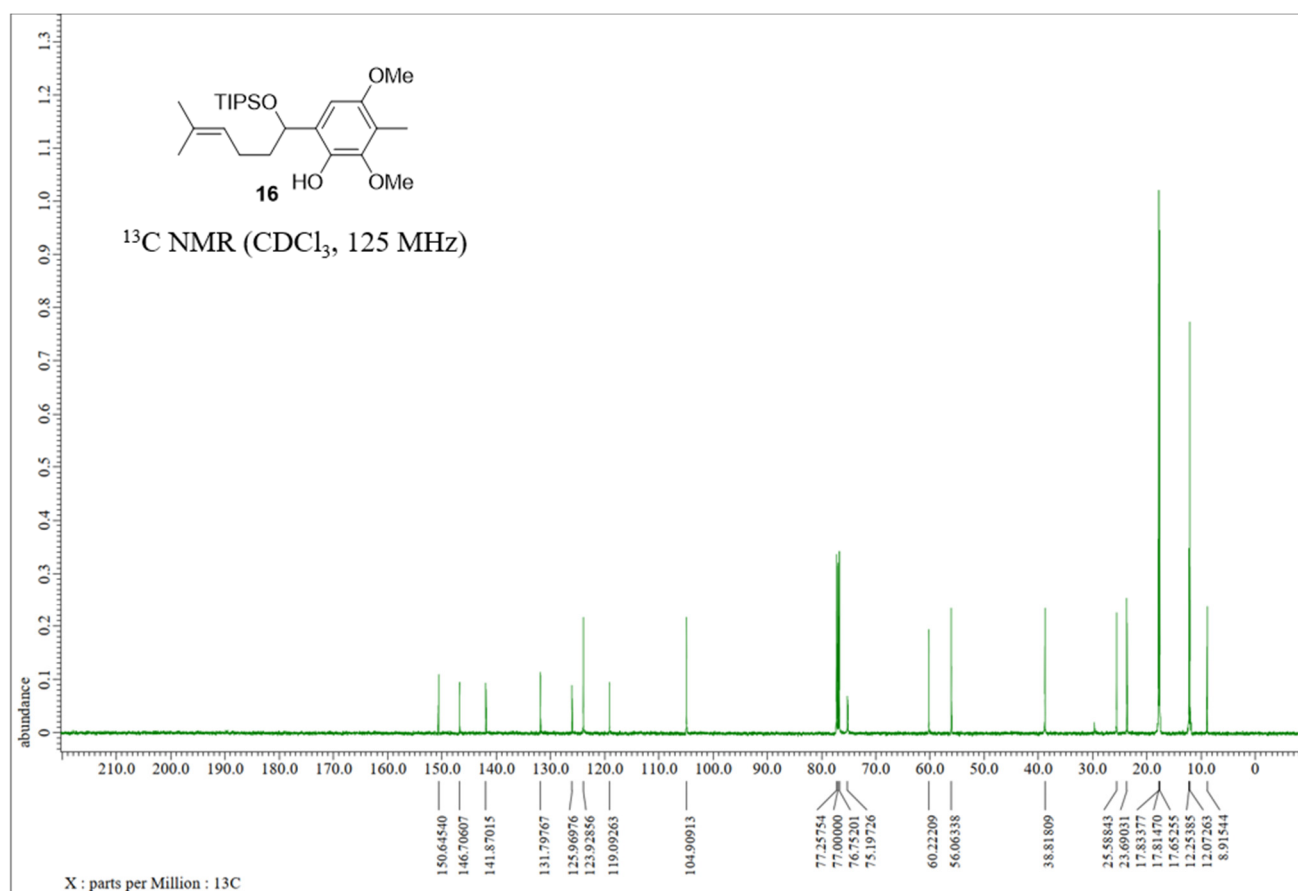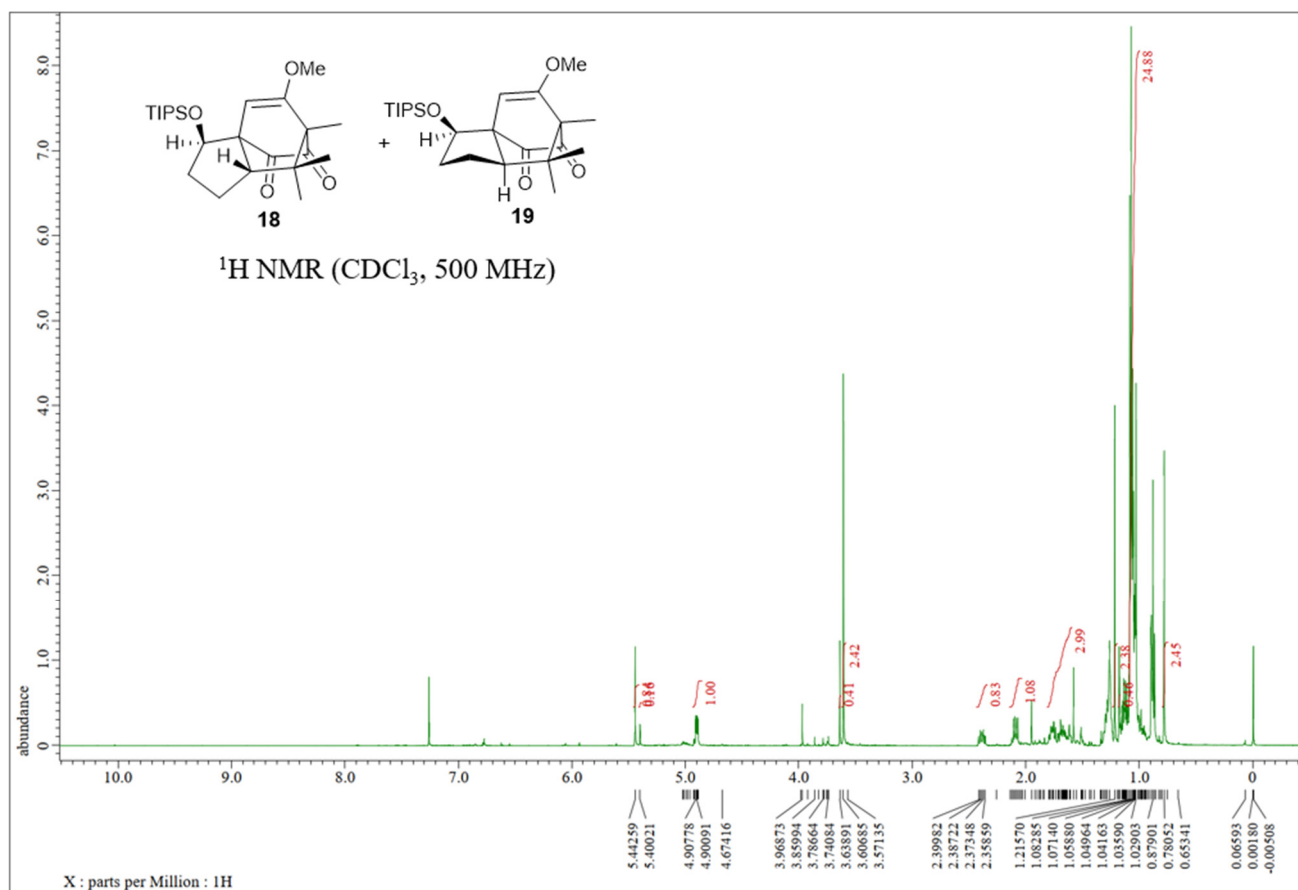

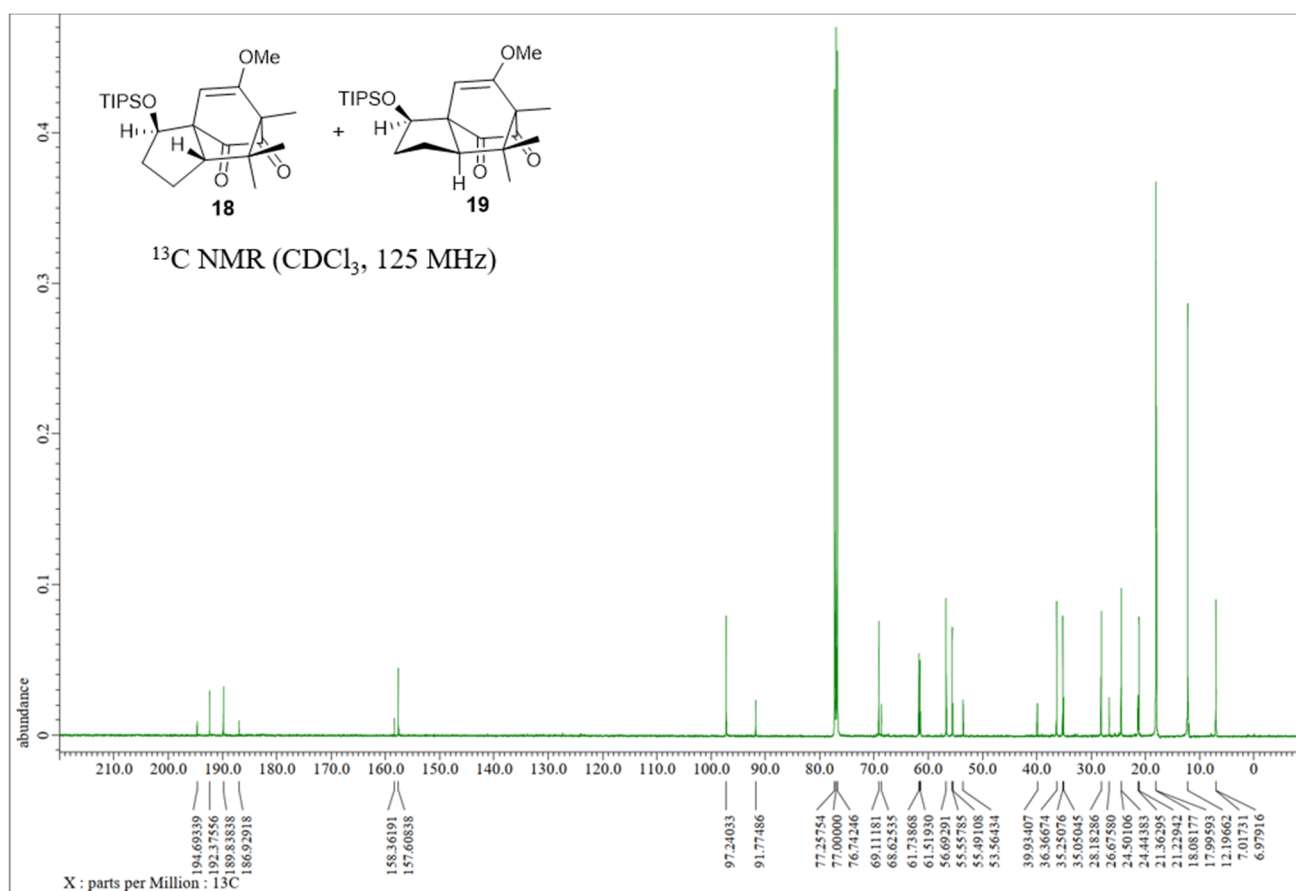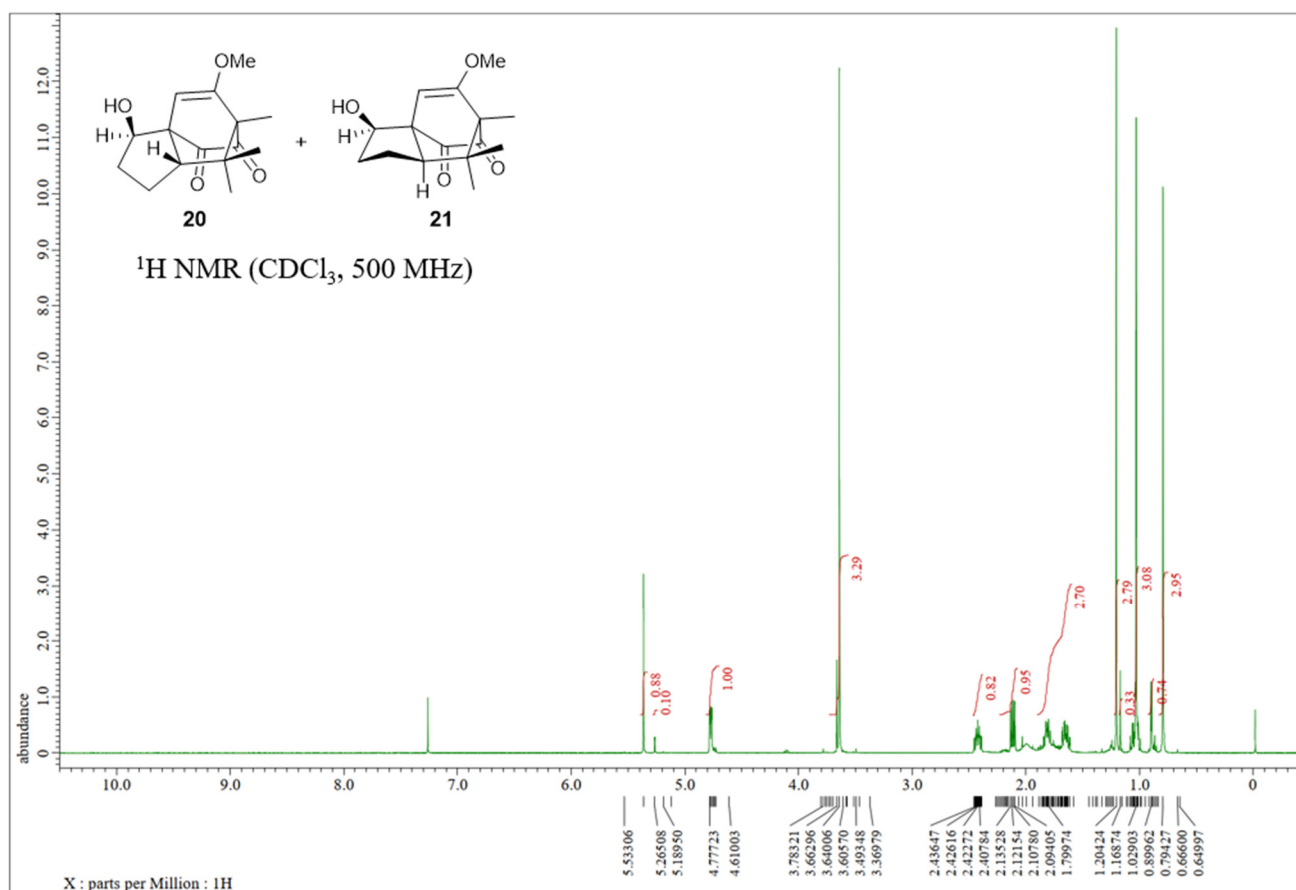

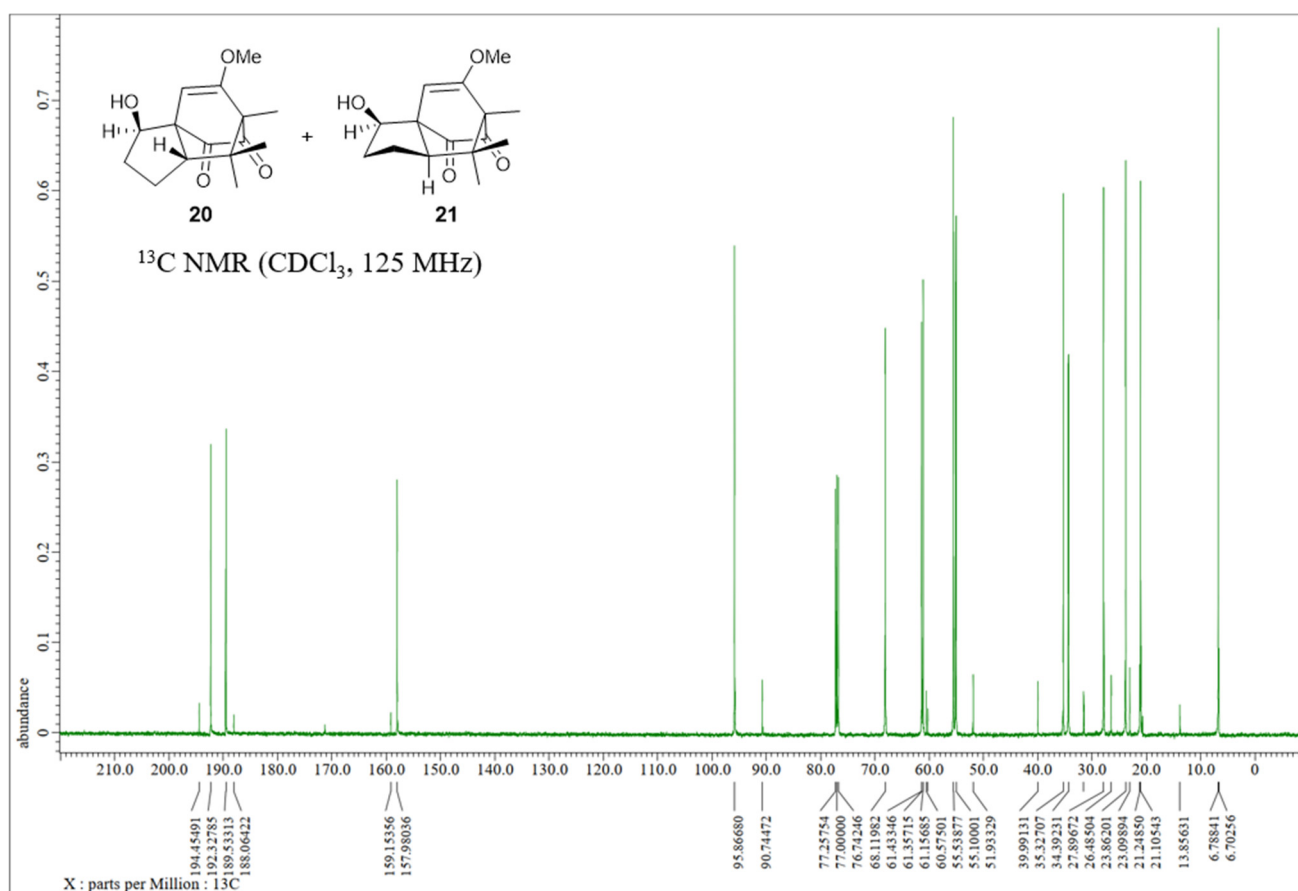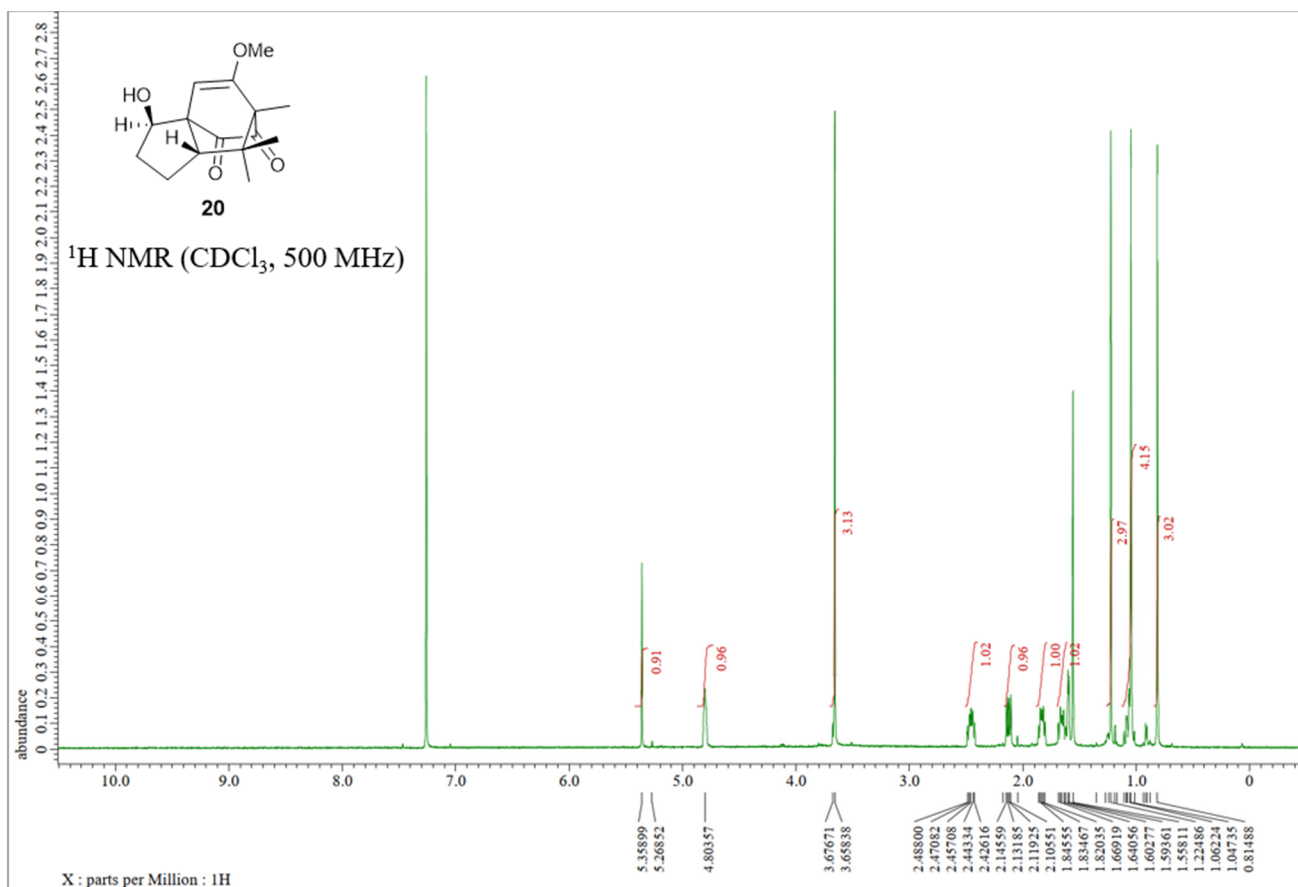

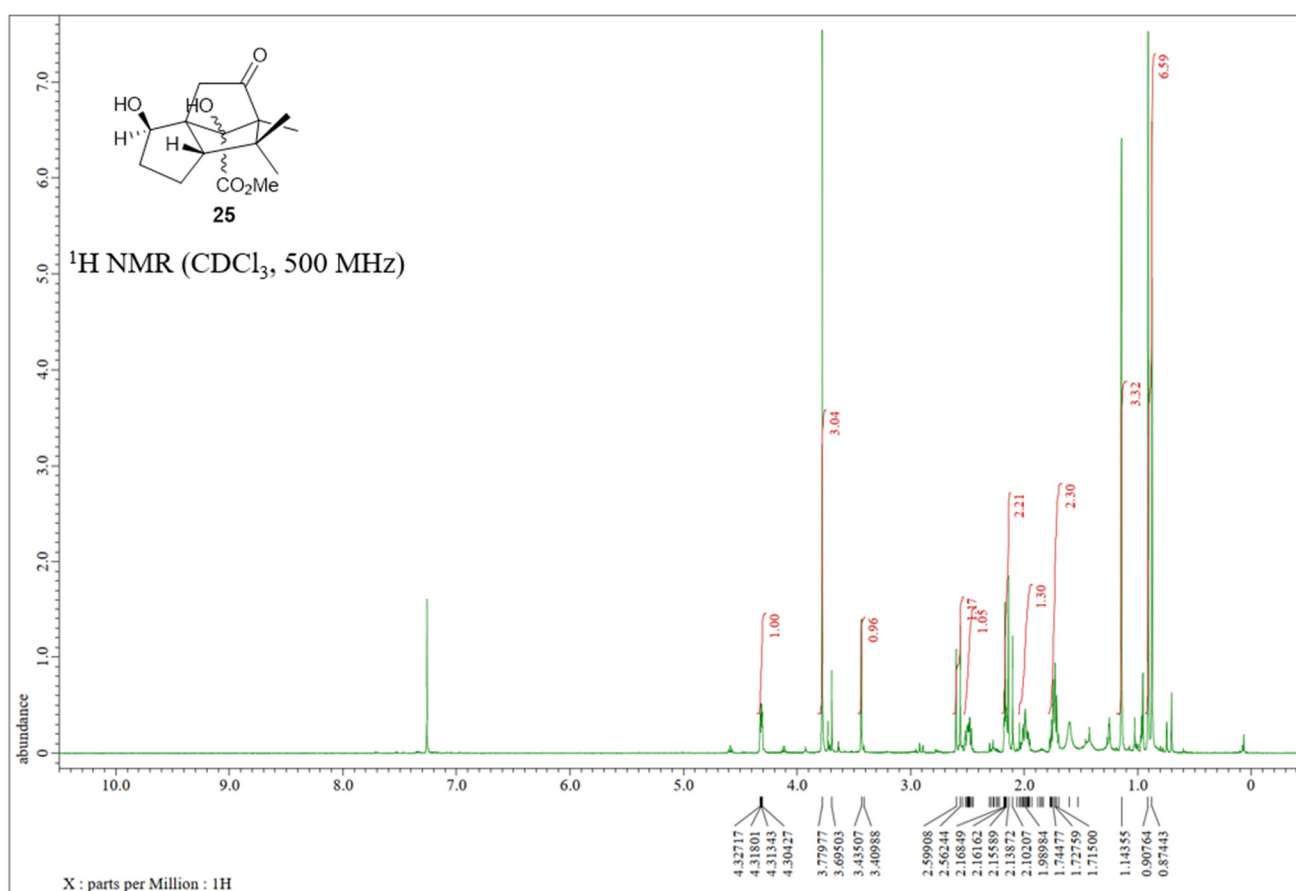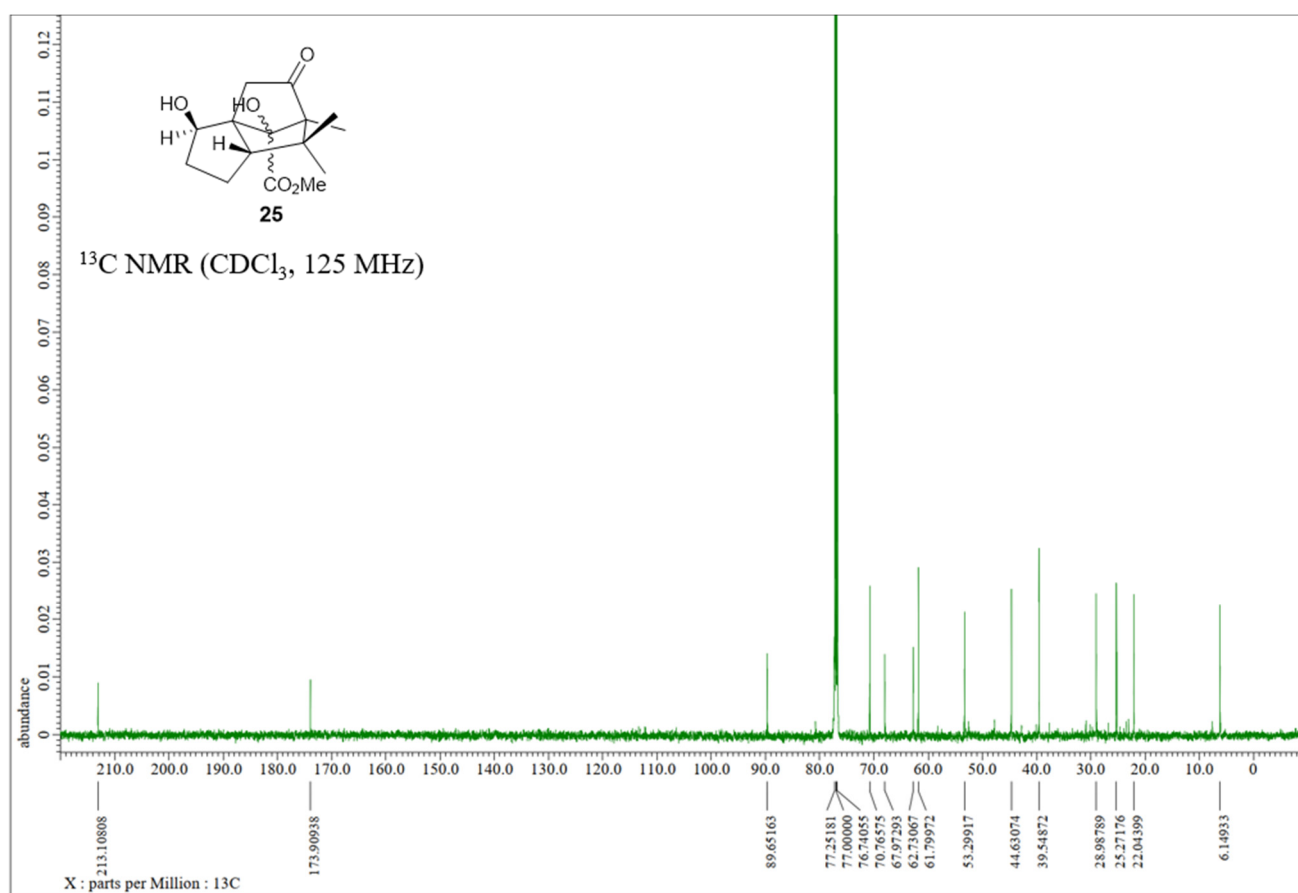

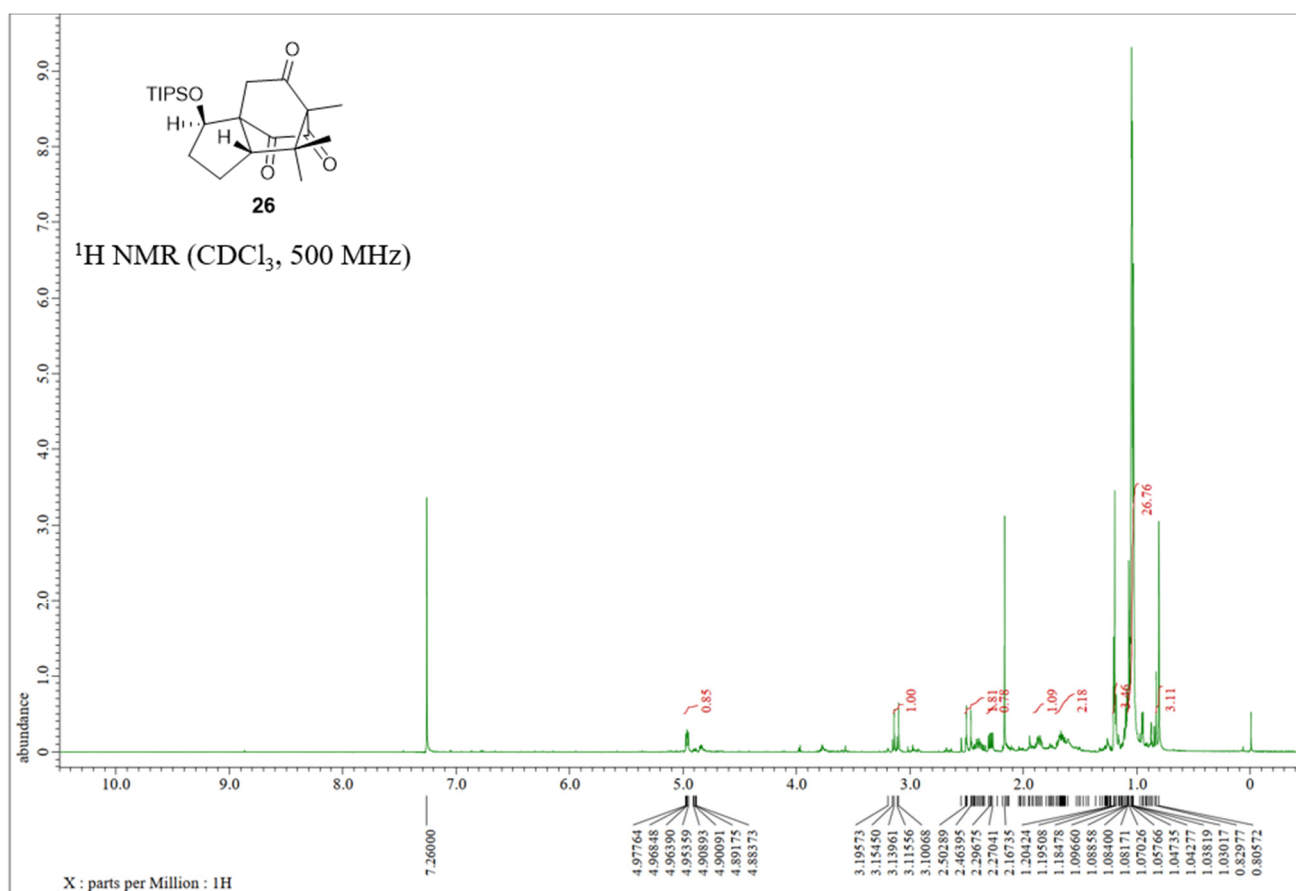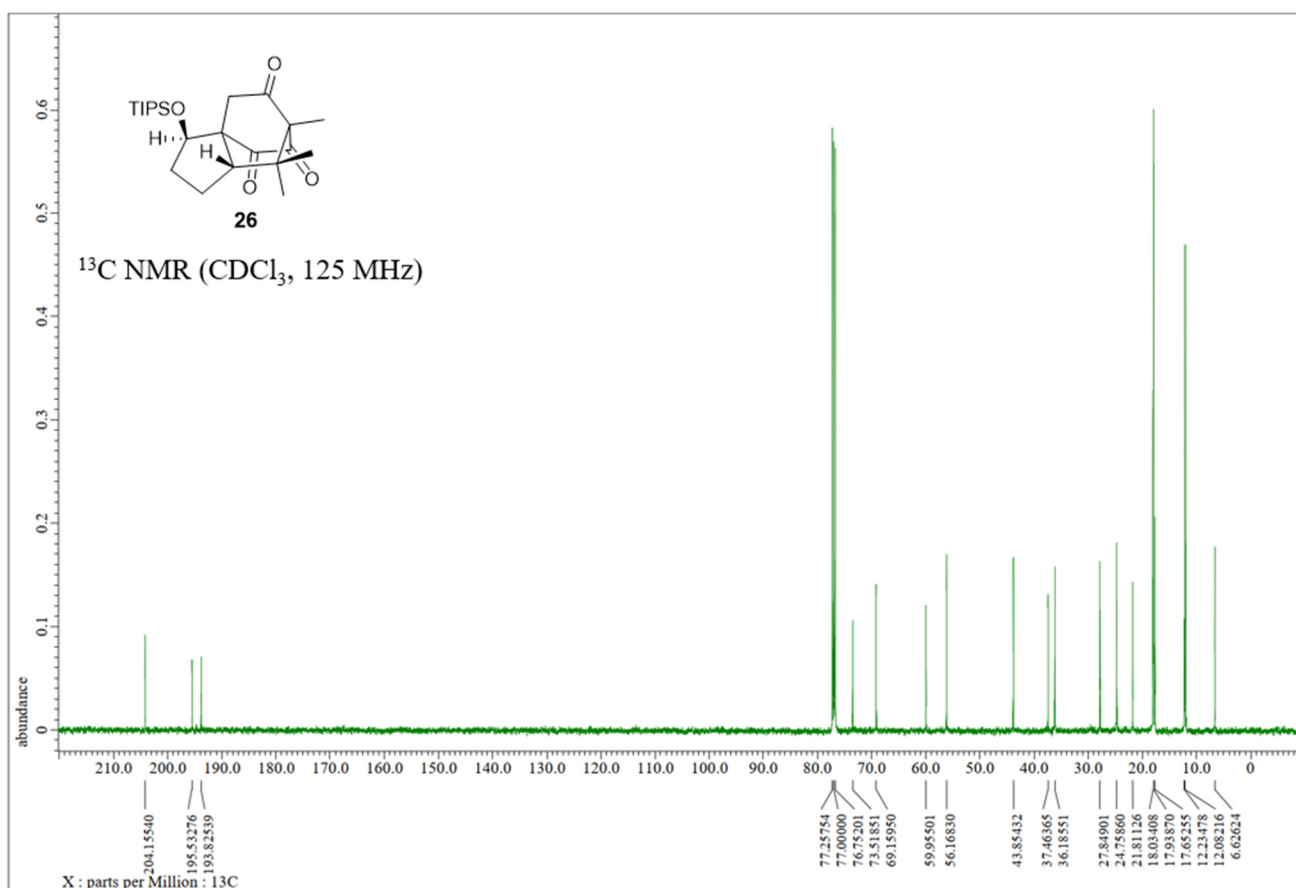

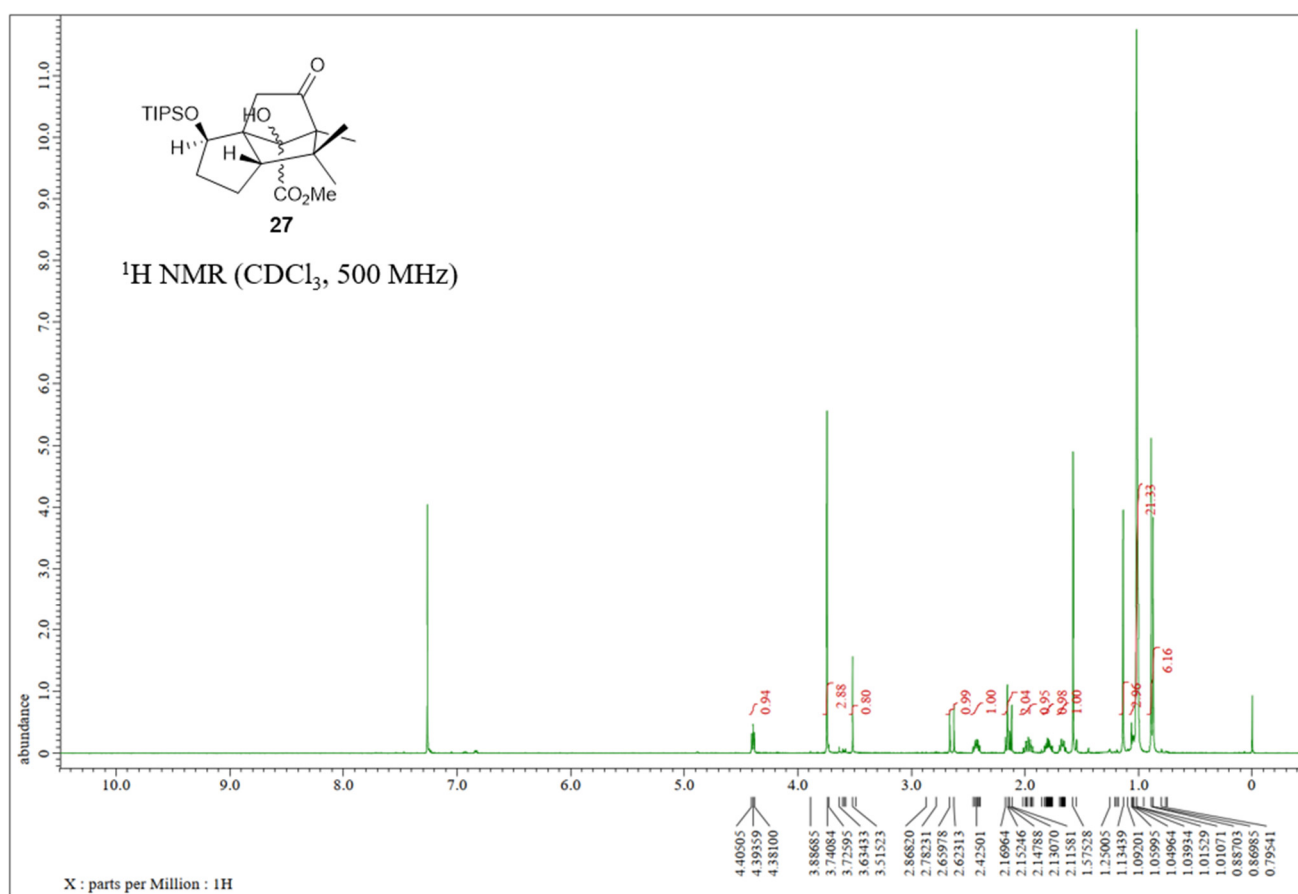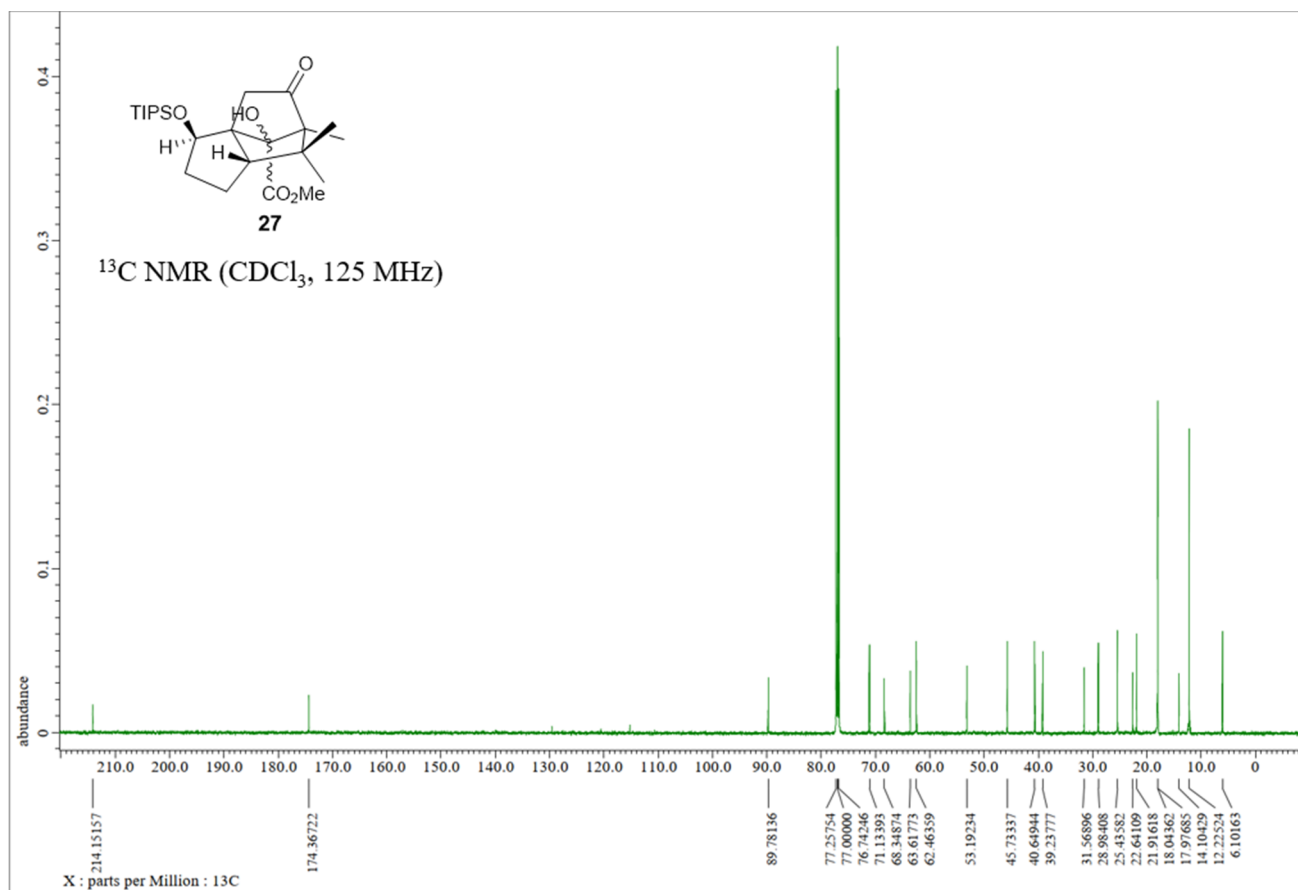

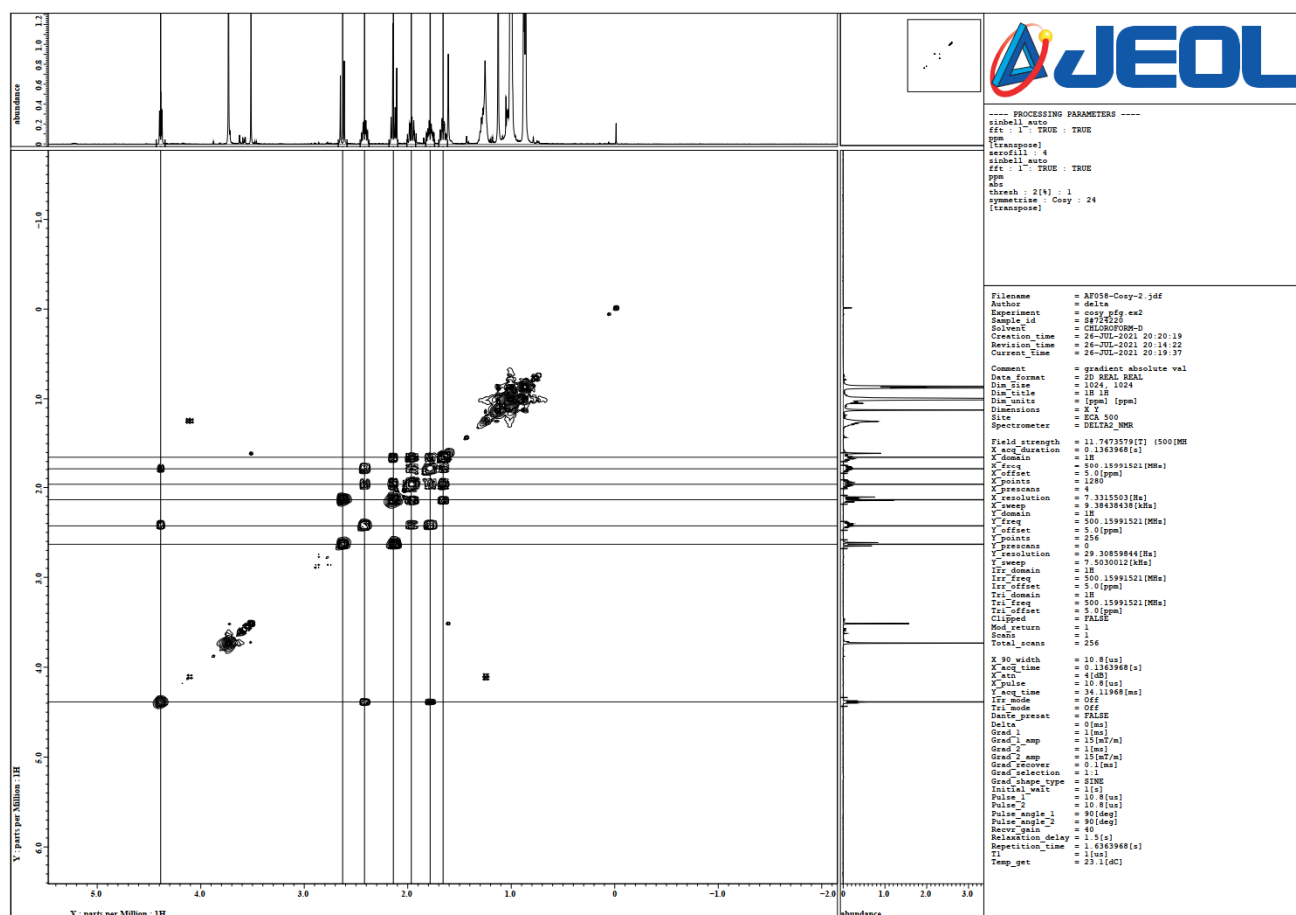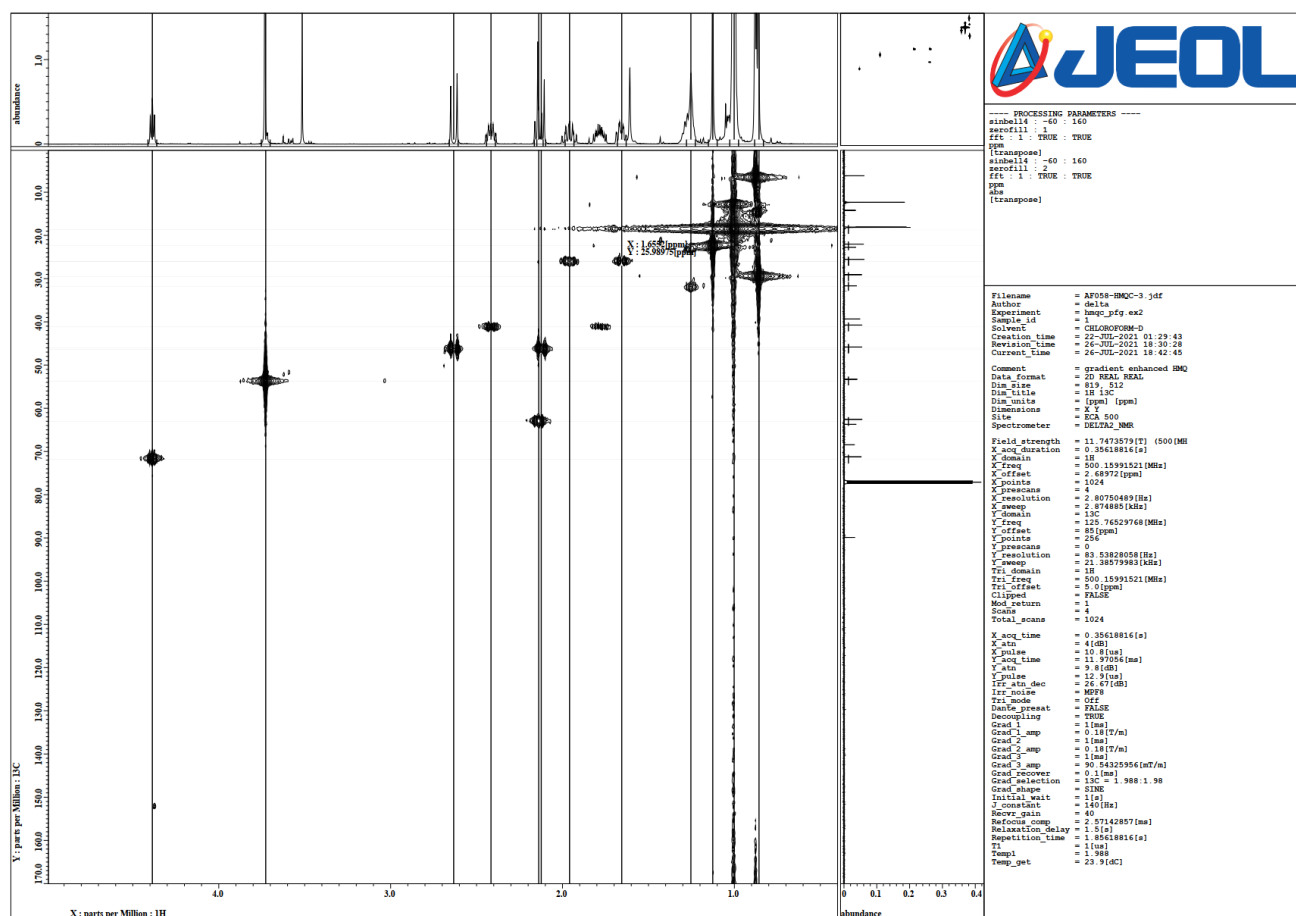

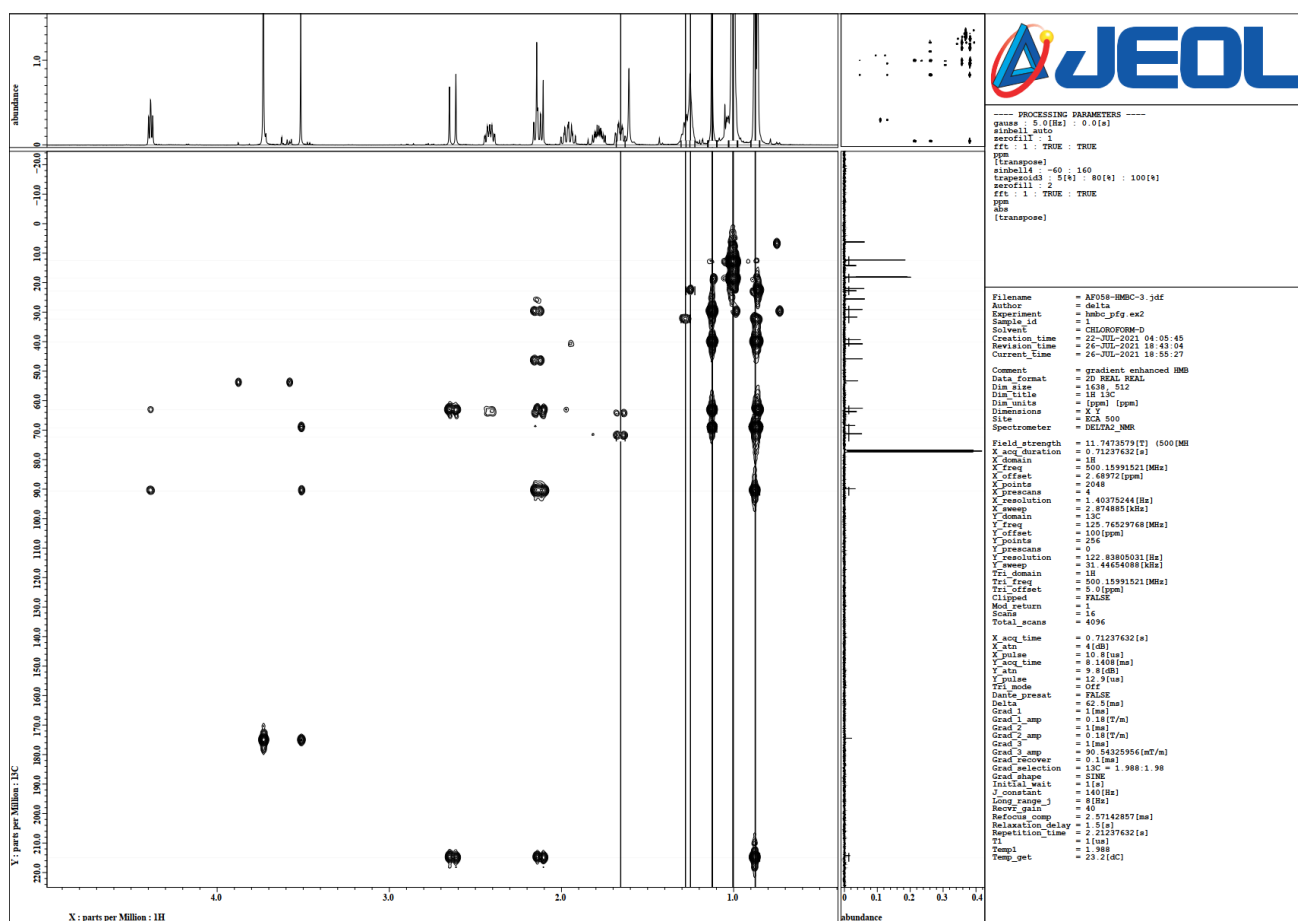

Supplement: s1 [file s1 › organics-1350185-supplementary.pdf]
